# Supplementary material for: An efficient Ni–P amorphous alloy electrocatalyst with a hierarchical structure toward borohydride oxidation
Source: Royal Society of Chemistry journal article supplement (doi:10.1039/d1dt01031j), 2021-01-01
Supplement: d1dt01031j1.pdf [file d1dt01031j1.pdf]

***Supporting Information for***  
***Ni-P Amorphous Alloy Efficient Electrocatalyst with***  
***Hierarchical Structure toward Borohydride Oxidation***

*Jingjing Yu,<sup>†</sup> Bihao Hu,<sup>†</sup> Chuanlan Xu,<sup>†</sup> Jiazhi Meng,<sup>†</sup> Shu Yang,<sup>†</sup> Yan Li,<sup>†</sup> Xiaoyuan*

*Zhou<sup>††</sup> Yuping Liu,<sup>†</sup> Danmei Yu,<sup>\*†</sup> and Changguo Chen<sup>\*†</sup>*

<sup>†</sup>School of Chemistry and Chemical Engineering, Chongqing University, Chongqing 401331, PR China

<sup>††</sup>College of Physics, Chongqing University, Chongqing 401331, PR China

**Corresponding Authors**

\*Danmei Yu's E-mail: [yudanmei-1@163.com](mailto:yudanmei-1@163.com).

\*Changguo Chen's E-mail: [cgchen@cqu.edu.cn](mailto:cgchen@cqu.edu.cn).

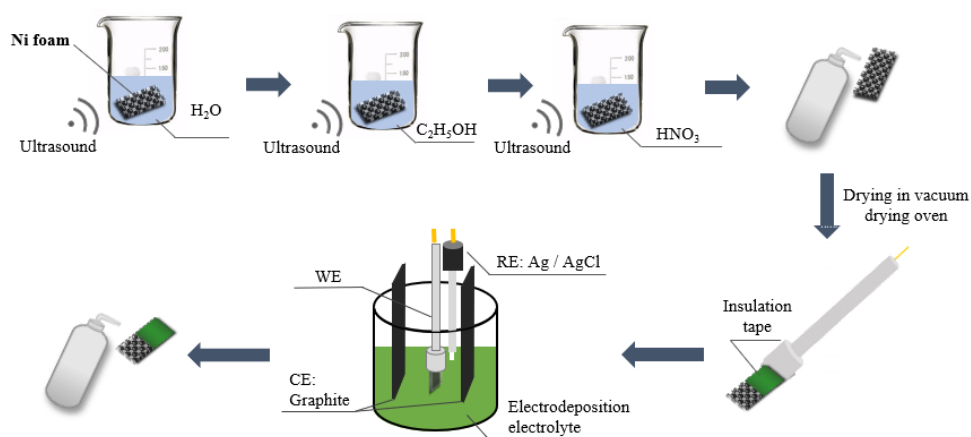

**Fig. S1** Schematic diagram of catalyst electrode preparation.

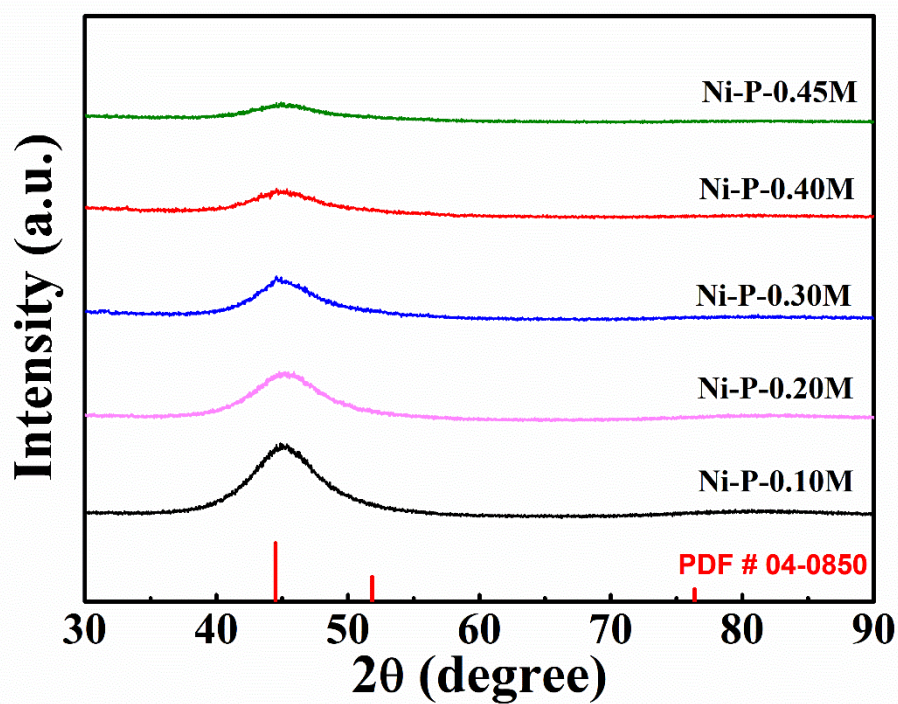

**Fig. S2** XRD patterns of Ni-P@NF catalysts with different P.

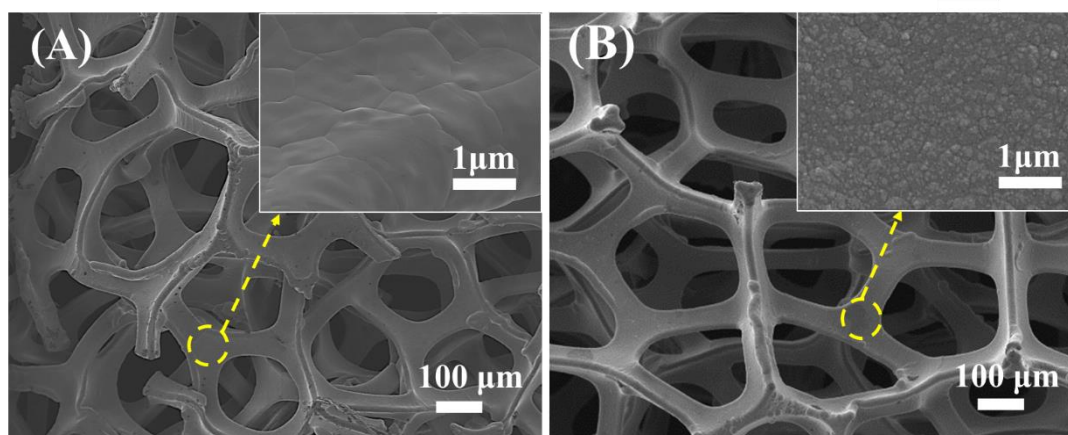

**Fig. S3** SEM images of (A) Ni foam, (B)Ni@NF.

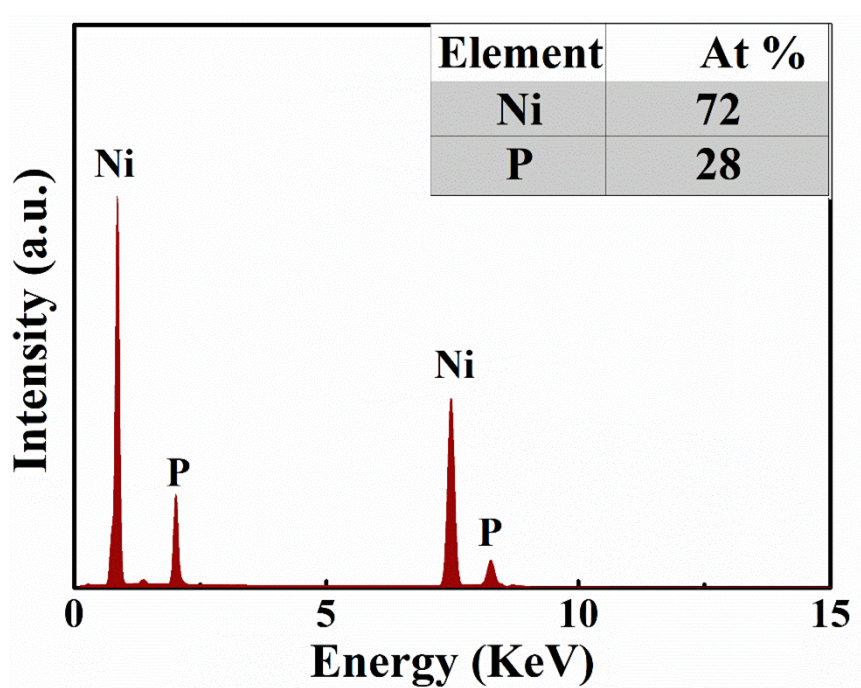

**Fig. S4** The EDS element distribution of Ni-P@NF was obtained from TEM.

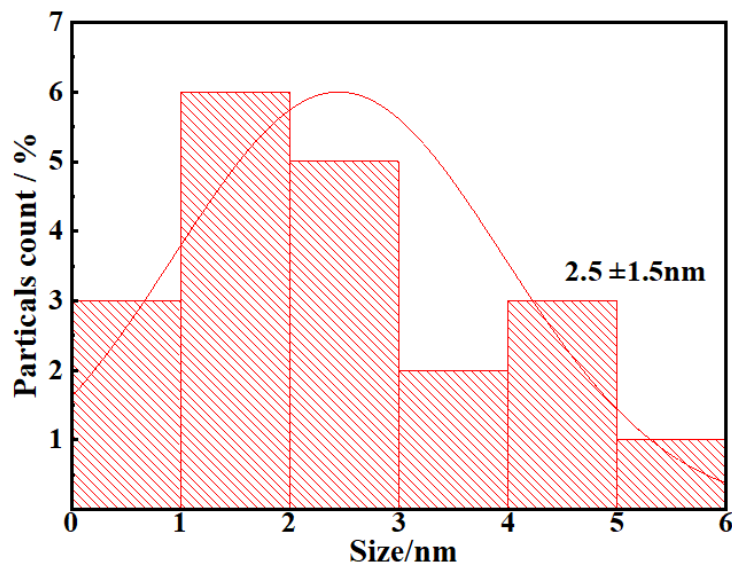

Fig. S5 Pore size distribution map obtained by TEM.

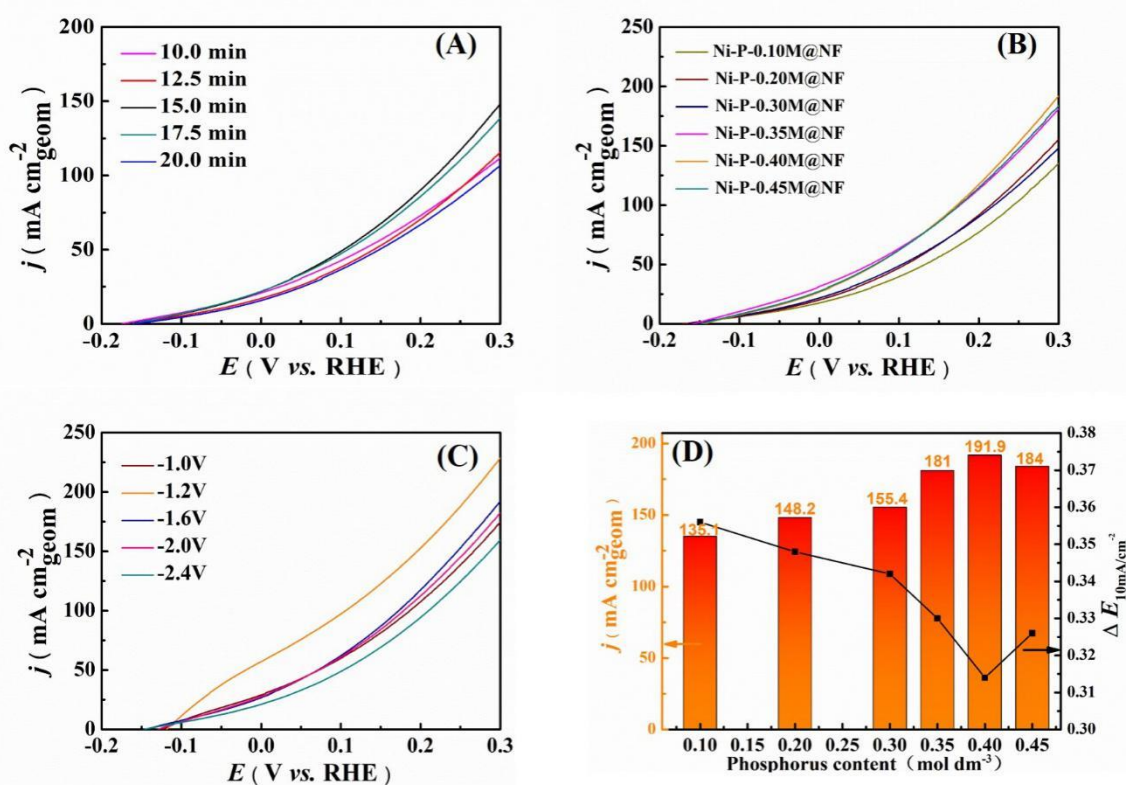

Fig. S6 (A)-(C) LSVs of BOR on the Ni-P@NF prepared by different deposition times, different phosphorus concentrations, different deposition potentials in 0.27 mol dm<sup>-3</sup> NaBH<sub>4</sub> and 2 mol dm<sup>-3</sup> NaOH solution with scan rate of 5 mV s<sup>-1</sup> at 298 K, (D) The current density of BOR and the overpotential at current density of 10 mA/cm<sup>2</sup> on the Ni-P@NF prepared by different phosphorus concentrations.

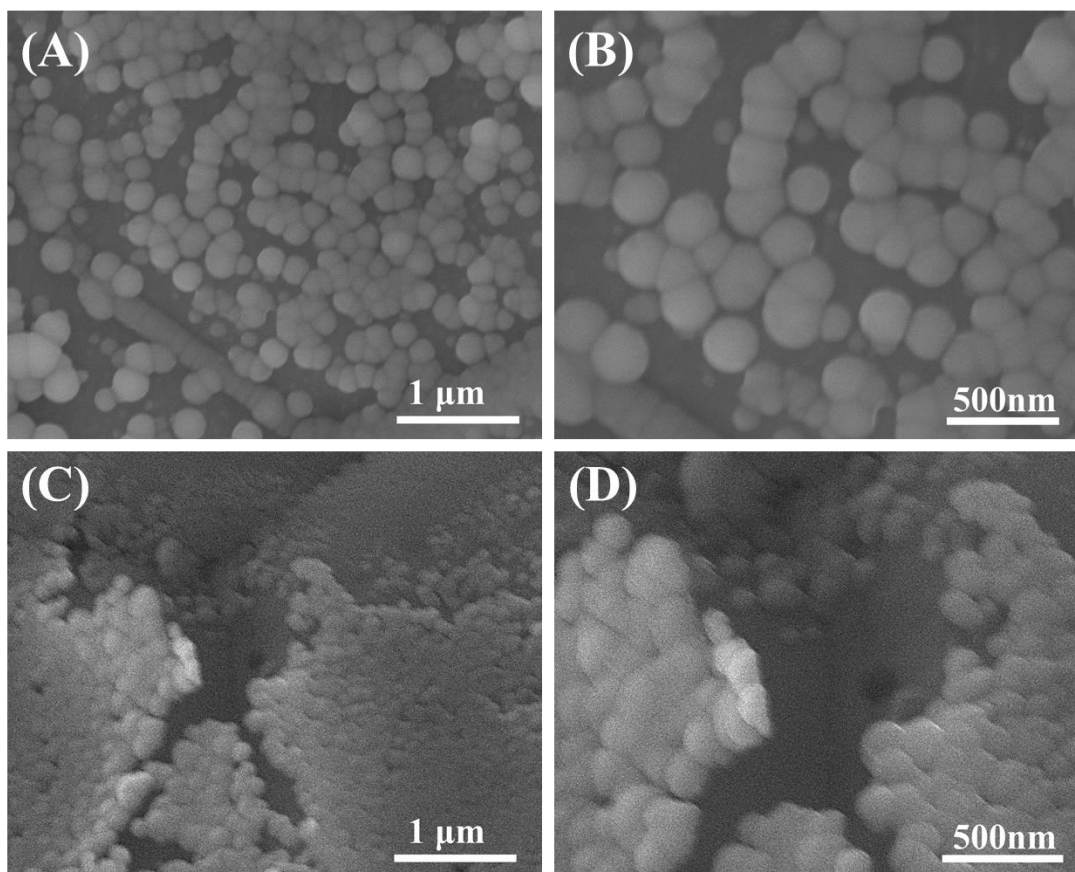

**Fig. S7** SEM image of Ni-P@NF (A-B) deposit for 15min, (C-D) deposit for 20min.

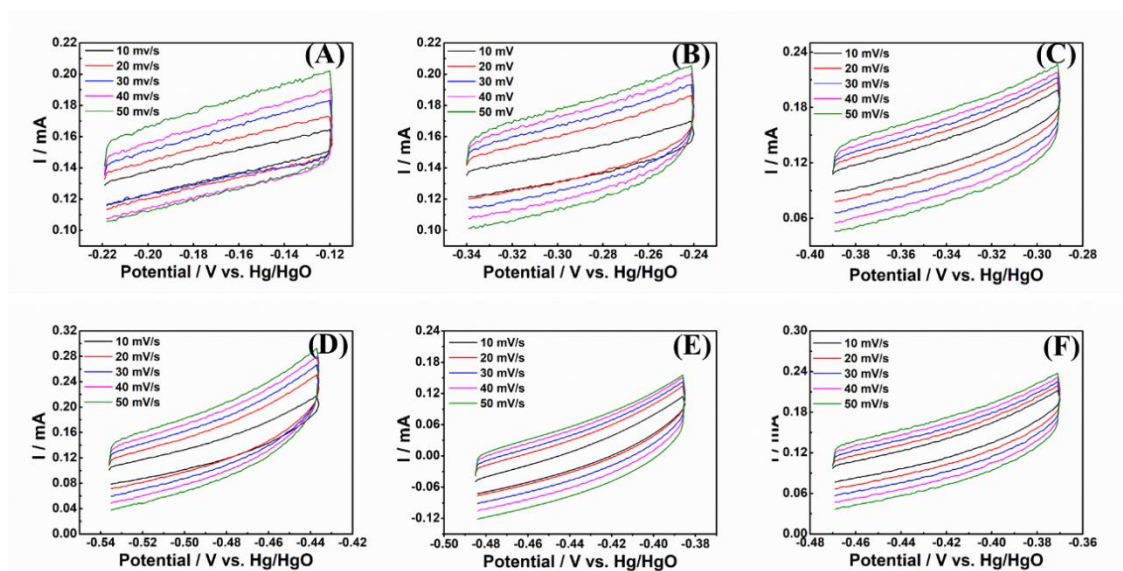

**Fig. S8** Cyclic voltammograms for (A) Ni@NF; (B) Ni-P-0.1@NF; (C) Ni-P-0.2@NF; (D) Ni-P-0.3@NF; (E) Ni-P-0.4@NF; and (F) Ni-P-0.45@NF in the 0.1 V potential window in 1 mol dm<sup>-3</sup> NaOH solution at scan rates of 10, 20, 30, 40, and 50 mV s<sup>-1</sup>.

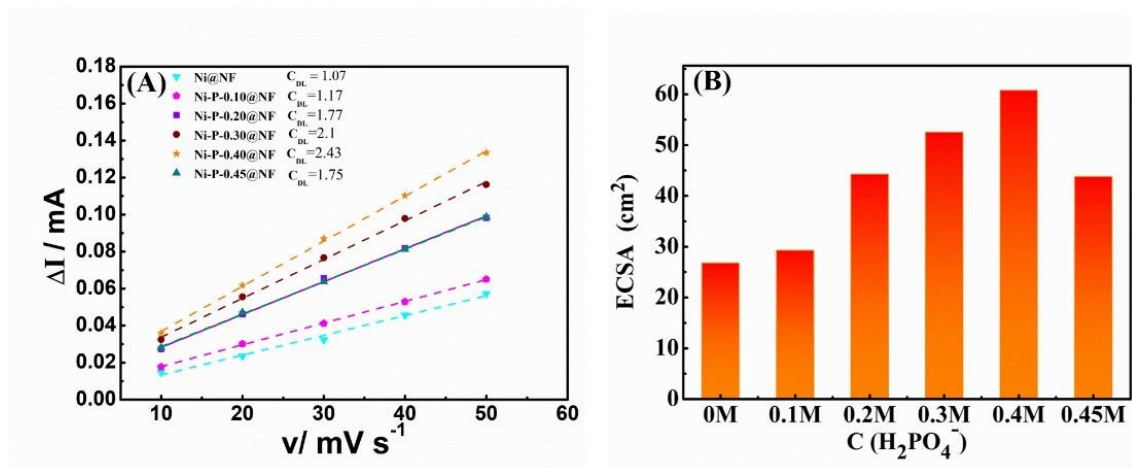

**Fig. S9** (A) Plots of the average anodic current density at the specific potential vs. Hg/HgO as a function of scan rate (10, 20, 30, 40, and 50  $\text{mV s}^{-1}$ ), (B) the relationship between active area and phosphorus concentration.

**Table S1.** The  $C_{DL}$  and ECSA of Ni-P electrodes.

| Catalysts    | $C_{DL} (\text{mF cm}^{-2})$ | $ECSA (\text{cm}^2)$ |
|--------------|------------------------------|----------------------|
| Ni @NF       | 1.07                         | 26.75                |
| Ni-P-0.10@NF | 1.17                         | 29.25                |
| Ni-P-0.20@NF | 1.77                         | 44.25                |
| Ni-P-0.30@NF | 2.10                         | 52.5                 |
| Ni-P-0.40@NF | 2.43                         | 60.75                |
| Ni-P-0.45@NF | 1.75                         | 43.75                |

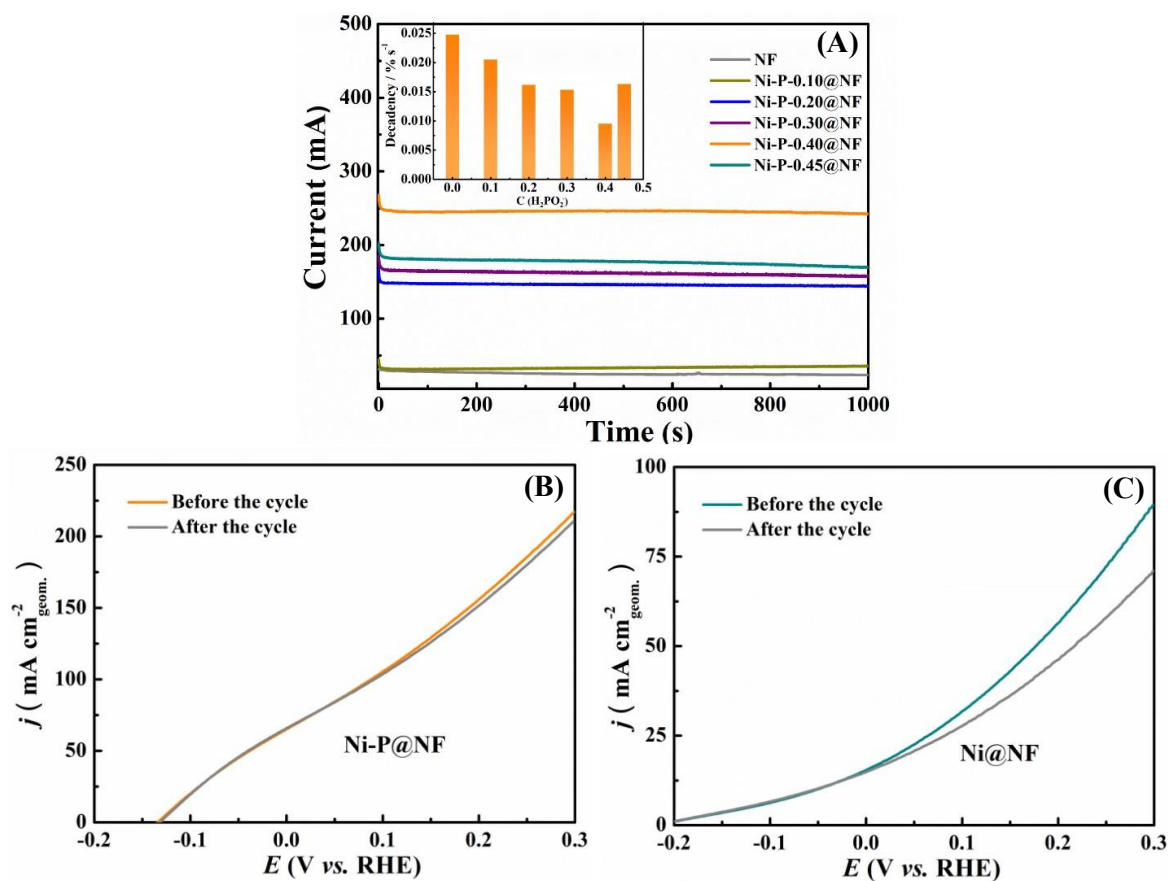

**Fig. S10** (A) Chronoamperometry curves of BOR on different catalysts in  $0.27 \text{ mol dm}^{-3} \text{ NaBH}_4$  and  $2 \text{ mol dm}^{-3} \text{ NaOH}$  at  $298 \text{ K}$ , (B-C) The accelerated lifetime test the Ni-P@NF, Ni @NF in  $0.27 \text{ mol dm}^{-3} \text{ NaBH}_4$  and  $2 \text{ mol dm}^{-3} \text{ NaOH}$  solution with scan rate of  $5 \text{ mV s}^{-1}$  at  $298 \text{ K}$ .

**Table S2.** EIS data of BOR on different catalyst electrodes

| Anode catalyst | $R_L (\Omega)$ | $R_{ct} (\Omega)$ | $C_d (\text{mF})$ |
|----------------|----------------|-------------------|-------------------|
| NF             | 1.715          | 421.2             | 0.1824            |
| Ni @NF         | 1.952          | 13.8              | 0.5054            |
| Ni-P@NF        | 1.658          | 1.23              | 0.902             |
